# Supplementary material for: Development of core@shell magnetic framework composite for immunoselective detection and capture of Salmonella typhimurium
Source: Royal Society of Chemistry journal article supplement (doi:10.1039/d3en00286a), 2023-01-01
Supplement: d3en00286a1.pdf [file d3en00286a1.pdf]

## Electronic Supplementary Information

### Development of core@shell magnetic framework composite for immunoselective detection and capture of *Salmonella typhimurium*

Saloni Sharma<sup>1,2</sup>, Gurjeet Kaur<sup>1,2</sup>, Manoj K. Nayak<sup>1,2,\*</sup>, Akash Deep<sup>1,3,\*</sup>

<sup>1</sup>Academy of Scientific and Innovative Research (AcSIR), Ghaziabad-201002, Uttar Pradesh, India; <sup>2</sup>CSIR-Central Scientific Instruments Organization (CSIR-CSIO), Sector 30C, Chandigarh-160030, India; <sup>3</sup>Institute of Nano Science and Technology (INST), Sector - 81, S.A.S. Nagar (Mohali), Punjab, 140306, India

\*Correspondence: [mknayak@csio.res.in](mailto:mknayak@csio.res.in), [akashdeep@inst.ac.in](mailto:akashdeep@inst.ac.in)

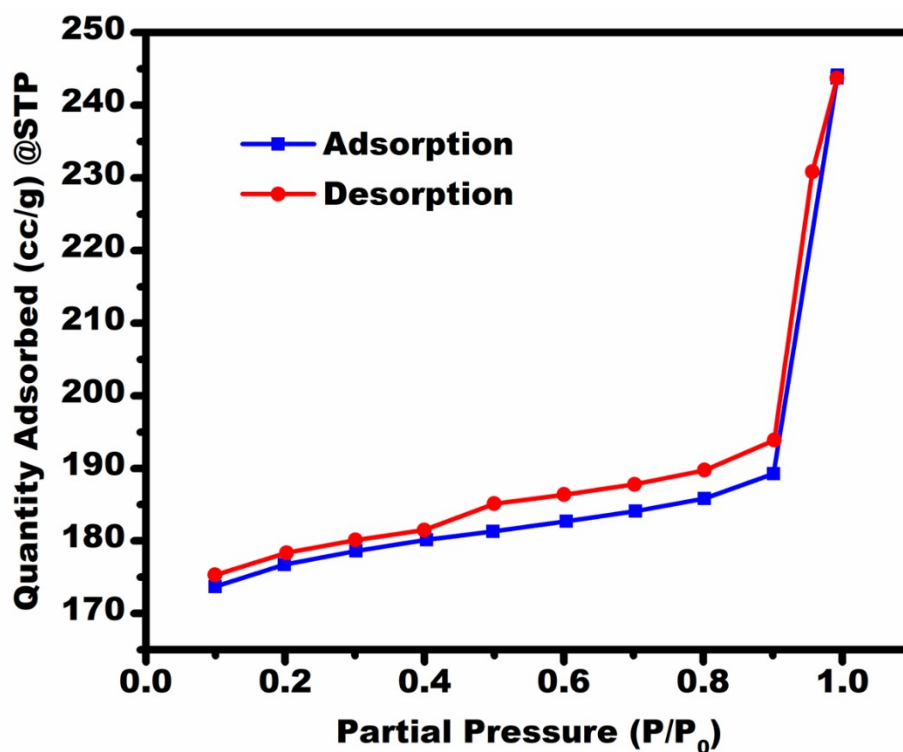

Fig S1. N<sub>2</sub> adsorption-desorption isotherm of Fe<sub>3</sub>O<sub>4</sub>/Si@MIL-125 (Ti), at 77 K under nitrogen atmosphere.

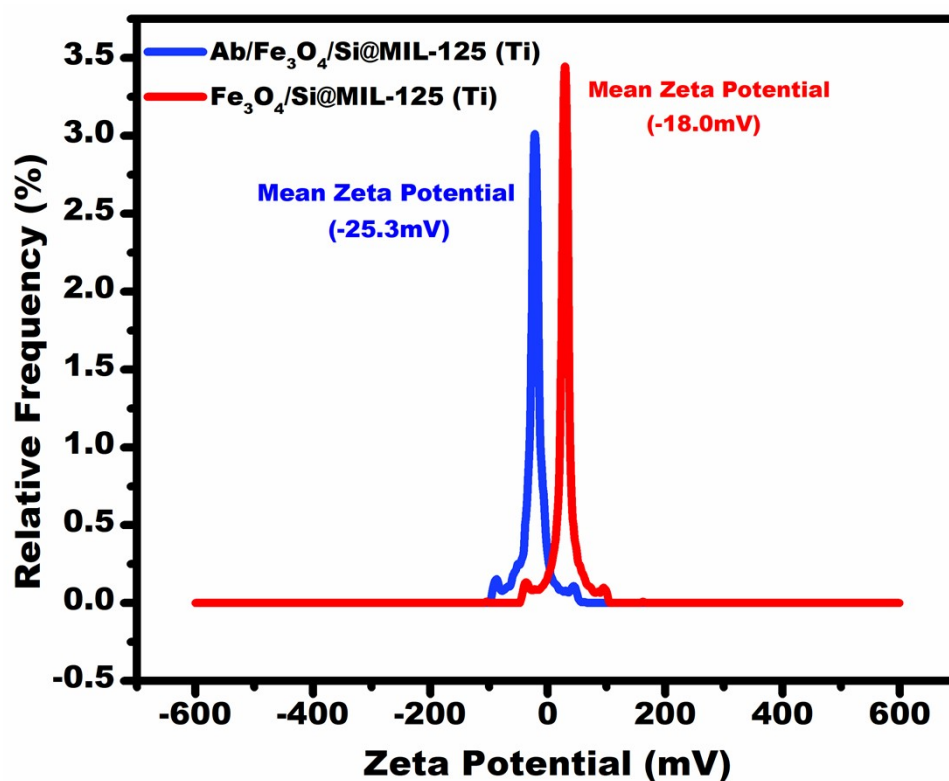

Fig S2. Zeta potential of Fe<sub>3</sub>O<sub>4</sub>/Si@MIL-125 (Ti) before and after antibody conjugation.

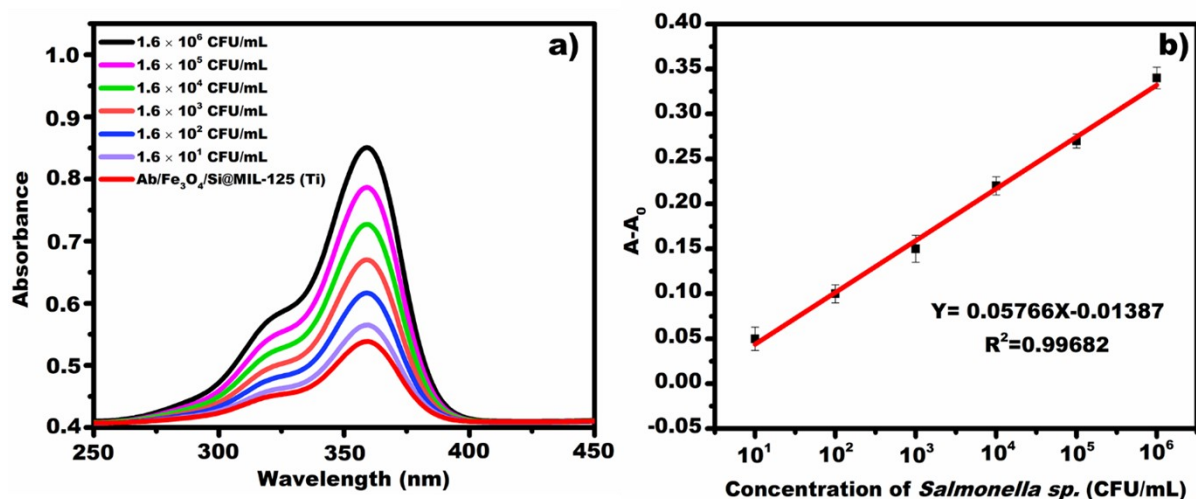

Fig S3. a) UV-Vis absorption spectra and b) corresponding calibration curve obtained at 355 nm when probe combined with different concentrations of *Salmonella sp.* where (A: absorbance value of the test sample;  $A_0$ : absorbance value of Ab/Fe<sub>3</sub>O<sub>4</sub>/Si@MIL-125 (Ti) which served as negative control). The error bars indicate absolute errors deduced from three replicate measurements.

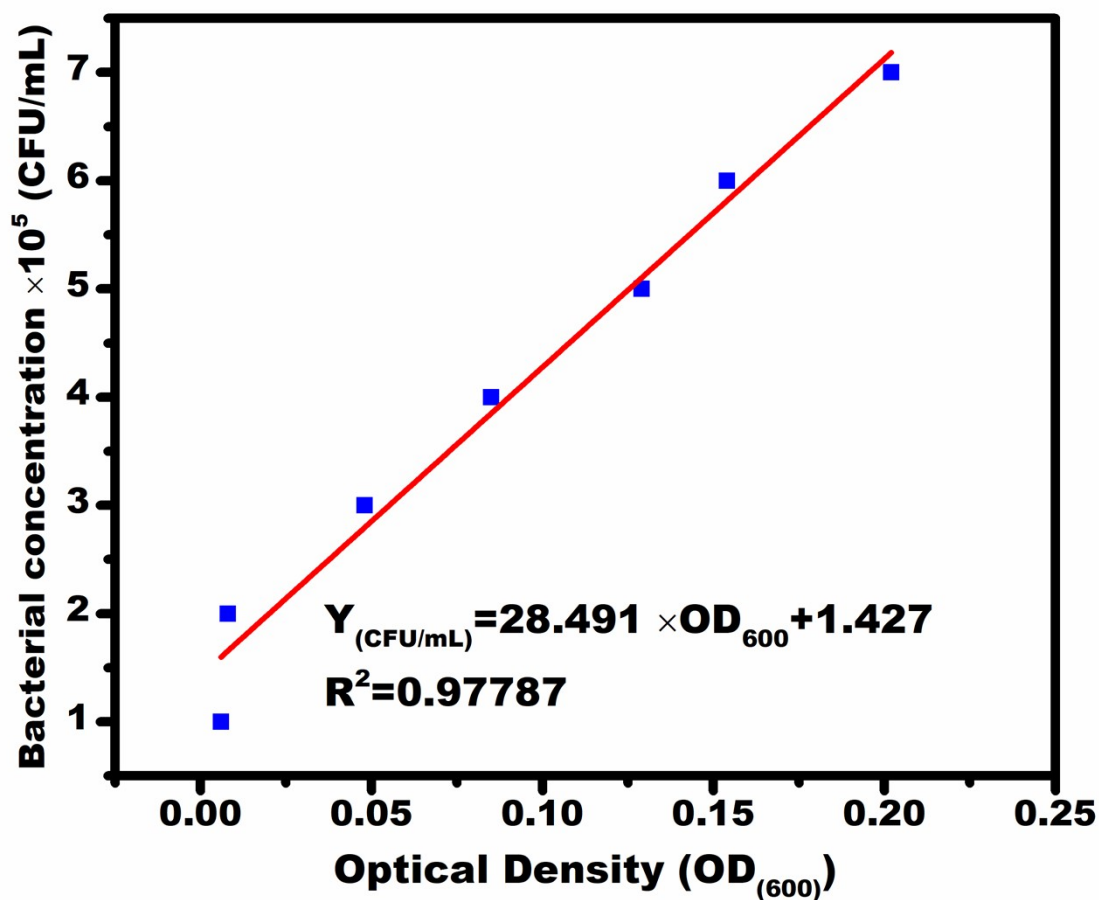

Fig S4. OD<sub>600</sub> versus CFU/mL plot of *Salmonella sp.*

**Table S1. Results of the ANOVA test at a 5% significance level for sensor response measurements of Ab/Fe<sub>3</sub>O<sub>4</sub>/Si@MIL-125 (Ti) biosensors for 4 different conditions.**

| <b>ANOVA</b>                |           |           |           |          |                |               |
|-----------------------------|-----------|-----------|-----------|----------|----------------|---------------|
| <b>Sources of Variation</b> | <b>SS</b> | <b>df</b> | <b>MS</b> | <b>F</b> | <b>P-value</b> | <b>F crit</b> |
| Between Groups              | 231467.3  | 3         | 77155.78  | 4.102629 | 0.020188       | 3.098391      |
| Within Groups               | 376128.5  | 20        | 18806.42  |          |                |               |
| Total                       | 607595.8  | 23        |           |          |                |               |

**Table S2. Results of Tukey's multiple comparisons test on various matching pairs.**

| <b>Treatment Pairs</b>          | <b>Tukey HSD Q statistic</b> | <b>Tukey HSD p-value</b> |
|---------------------------------|------------------------------|--------------------------|
| Concentration vs. Inter - assay | 4.2660                       | 0.0318143                |
| Concentration vs. Intra- assay  | 4.1918                       | 0.0355318                |
| Concentration vs. Selectivity   | 2.4000                       | 0.3515979                |
| Inter – assay vs. Intra-assay   | 0.1243                       | 0.8999947                |
| Inter – assay vs. Selectivity   | 2.0270                       | 0.4944686                |
| Intra – assay vs. Selectivity   | 2.0545                       | 0.4836007                |

**Table S3. Results of the ANOVA test at a 5% significance level for the removal efficiency measurements of Ab/Fe<sub>3</sub>O<sub>4</sub>/Si@MIL-125 (Ti) towards *Salmonella sp.***

| <b>ANOVA</b>                |           |           |           |          |                |               |
|-----------------------------|-----------|-----------|-----------|----------|----------------|---------------|
| <b>Sources of Variation</b> | <b>SS</b> | <b>df</b> | <b>MS</b> | <b>F</b> | <b>P-value</b> | <b>F crit</b> |
| Between Groups              | 176.2222  | 2         | 88.11111  | 113.2857 | 1.72E-05       | 5.143253      |
| Within Groups               | 4.666667  | 6         | 0.777778  |          |                |               |
| Total                       | 180.8889  | 8         |           |          |                |               |

**Table S4. Results of Tukey's multiple comparisons test on various matching pairs.**

| <b>Treatment Pairs</b>                     | <b>Tukey HSD Q statistic</b> | <b>Tukey HSD p-value</b> |
|--------------------------------------------|------------------------------|--------------------------|
| 10 <sup>4</sup> vs. 10 <sup>5</sup> CFU/mL | 7.2012                       | 0.0053422                |
| 10 <sup>4</sup> vs. 10 <sup>6</sup> CFU/mL | 20.9489                      | 0.0010053                |
| 10 <sup>5</sup> vs. 10 <sup>6</sup> CFU/mL | 13.7477                      | 0.0010053                |
